# Supplementary material
Source: PubMed Central journal article supplement (PMC3010270)
Supplement: NIHMS233060-supplement-Supp_Fig_s1.pdf [file NIHMS233060-supplement-Supp_Fig_s1.pdf]

*O. nigriventris* Horned Males

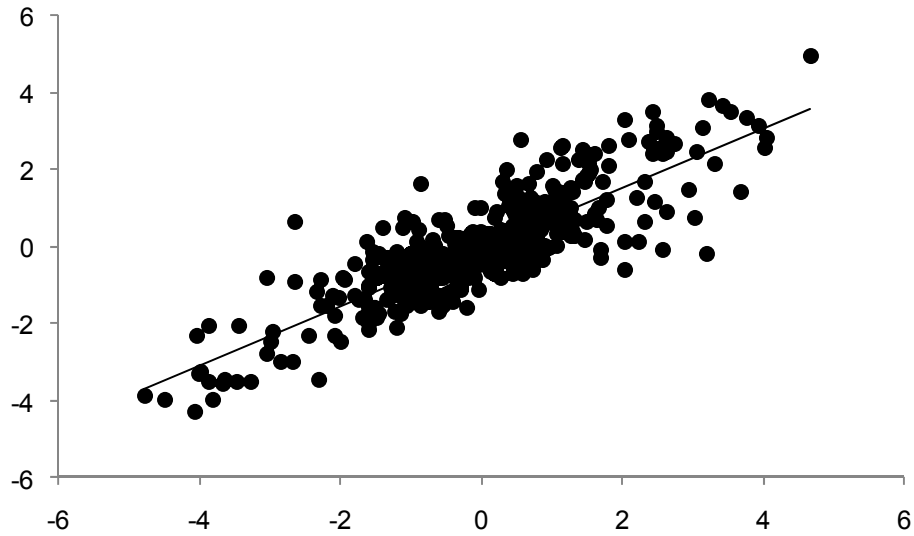

*O. taurus* Horned Males

*higher relative  
expression in abdomen*

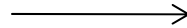

*higher relative  
expression in thorax*
