# Supplementary material
Source: PubMed Central journal article supplement (PMC3010270)

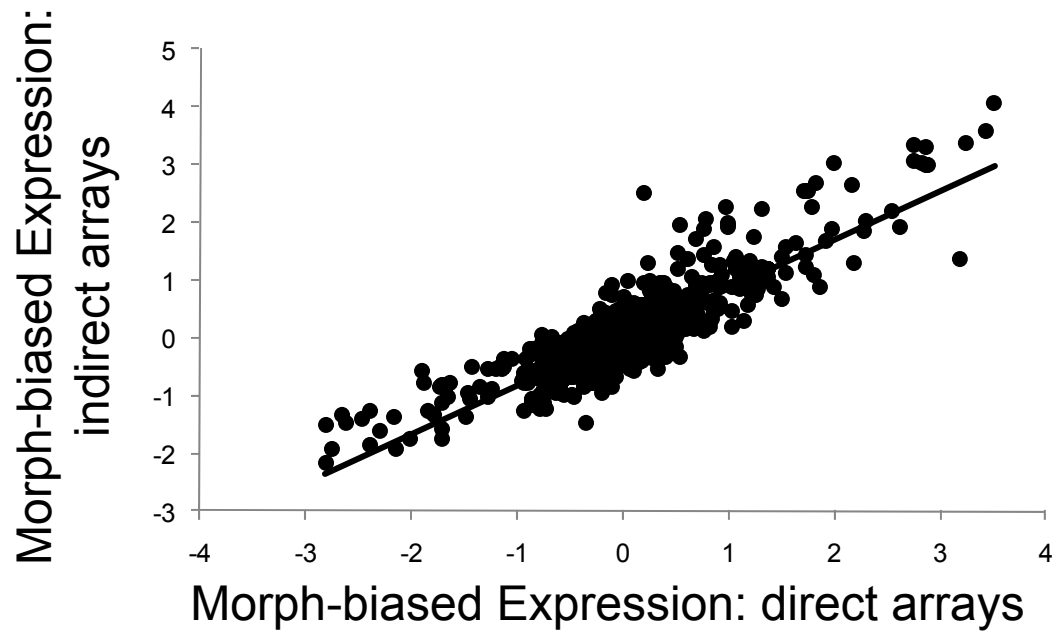

*higher relative expression  
in sneaker males*

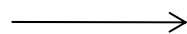

*higher relative expression  
in horned males*

Supplement: NIHMS233060-supplement-Supp_Fig_s2.pdf [file NIHMS233060-supplement-Supp_Fig_s2.pdf]
